# Supplementary material
Source: MDPI journal article supplement (https://www.mdpi.com/2071-1050/7/9/12758)
Supplement: s1 [file s1]

## QUESTIONNAIRE SURVEY

*BEČVA RIVER BASIN — RESEARCH OF EXTREME WEATHER EVENTS AND THEIR IMPACTS ON SOCIO-ECONOMIC CONDITIONS, ADAPTATION AND POPULATION DYNAMICS*

*Ladies and gentleman,*

*you take part in questionnaire survey concerning on social and economical changes of the municipalities affected by floods or droughts. We would like to ask you about several questions concerning your livelihood and adaptation strategies to extreme weather events within last 15 years, including your evaluation of weather and climate changes.*

*We also research, to what extend was your livelihood affected by other weather events and environmental changes (extreme winds, precipitations, soil and water erosion). Moreover, we ask you about some social and economical data concerning your livelihood.*

***We want you to assure you of the fact that questionnaire is fully anonymous and we will treat acquired data only for research purposes. We do not give your personal data and names to anybody else. We intend to use only aggregate anonymous data for purposes of publications in scientific journals, public releases in newspapers or as a groundwork for governments. Our paper would focus on weather, environmental and socio-economic changes in your country to show how is your livelihood exacting and what kind of troubles you have to overcome.***

***We ask you to fill the questionnaire openly and truthfully. Only through the right answers, we get the truthful picture about your livelihood and environment.***

*Thank you very much for your openness and cooperation.*

***Mgr. Robert Stojanov, Ph.D.***  
*(survey coordinator)*

**Questionnaire number**\_\_\_\_\_

**Date:**\_\_\_\_\_ **Interviewer:**\_\_\_\_\_

**City:**\_\_\_\_\_ **City area/street:**\_\_\_\_\_

**Date**\_\_\_\_\_

Risk category:      HIGH              LOW              NONE              DRY

Name of watercourse/ source of risk:\_\_\_\_\_

Estimate the distance of the house from the river /stream - source of flooding  
(using a map):\_\_\_\_\_ m

Written by:\_\_\_\_\_

Filled in part:              A      B      C      F      G      H      I

Start time:\_\_\_\_\_              End time:\_\_\_\_\_

#### DISTRIBUTION OF RESPONDENTS

- 1.** Have you had personal experience with floods from the river Thaya (or its tributaries?)  
Yes --> Go to question **1.A.**  
No ---> Go to question **7.A.**

## PART A - EXPERIENCE WITH FLOODS AND OTHER NATURAL RISKS

This part applies to your household and is focused on the level of contact with natural risks

**1.A** In which years did you come into contact with floods?

1. 1997

2. 2002

3. 2006

4. 2009

5. 2010

6. Other month - year \_\_\_\_\_

**2.A** What property was affected by the water?

(3 - most affected, 1 - least affected)

|                | house  | cellar | land (fields, garden) | Livestock | workshops, outbuildings | Food store (utility room) | garage |
|----------------|--------|--------|-----------------------|-----------|-------------------------|---------------------------|--------|
| Current Status | yes no | yes no | yes no                | yes no    | yes no                  | yes no                    | yes no |
| 1997           | 1 2 3  | 1 2 3  | 1 2 3                 | 1 2 3     | 1 2 3                   | 1 2 3                     | 1 2 3  |
| 2002           | 1 2 3  | 1 2 3  | 1 2 3                 | 1 2 3     | 1 2 3                   | 1 2 3                     | 1 2 3  |
| 2006           | 1 2 3  | 1 2 3  | 1 2 3                 | 1 2 3     | 1 2 3                   | 1 2 3                     | 1 2 3  |
| 2009           | 1 2 3  | 1 2 3  | 1 2 3                 | 1 2 3     | 1 2 3                   | 1 2 3                     | 1 2 3  |
| 2010           | 1 2 3  | 1 2 3  | 1 2 3                 | 1 2 3     | 1 2 3                   | 1 2 3                     | 1 2 3  |
| Other year:    |        |        |                       |           |                         |                           |        |

**3.A.1** Other property \_\_\_\_\_

**3.A.2** Extent of damage \_\_\_\_\_

**4.A** Can you name specific examples of other ways your house was affected by flooding (e.g. landslides, chemical store, contamination of wells, etc.)?

Example: \_\_\_\_\_

Year: \_\_\_\_\_

Example: \_\_\_\_\_

Year: \_\_\_\_\_

Example: \_\_\_\_\_

Year: \_\_\_\_\_

**5.A** Can you specify (in thousands of CZK), the amount of financial loss due to flooding?

Note - Please provide a specific number if the respondent remembers it.

|             | 0 - 50 | 50 - 100 | 100 - 200 | 200 - 500 | 500 - 1.mil. | 1. mil. and more |
|-------------|--------|----------|-----------|-----------|--------------|------------------|
| 1997        |        |          |           |           |              |                  |
| 2002        |        |          |           |           |              |                  |
| 2006        |        |          |           |           |              |                  |
| 2009        |        |          |           |           |              |                  |
| 2010        |        |          |           |           |              |                  |
| Other year: |        |          |           |           |              |                  |

**6.A** Try to estimate how you paid for the damage

(100% - full compensation, 0% - no compensation paid)

|            | insurance | own resources | Exceptional immediate assistance | commercial loan | (Municipal) grant to refurbish household etc. | Preferential state loan for reconstruction <sup>1</sup> |
|------------|-----------|---------------|----------------------------------|-----------------|-----------------------------------------------|---------------------------------------------------------|
| 1997       |           |               |                                  |                 |                                               |                                                         |
| 2002       |           |               |                                  |                 |                                               |                                                         |
| 2006       |           |               |                                  |                 |                                               |                                                         |
| 2009       |           |               |                                  |                 |                                               |                                                         |
| 2010       |           |               |                                  |                 |                                               |                                                         |
| Other year |           |               |                                  |                 |                                               |                                                         |

<sup>1</sup>For example, from the Ministry of Regional Development or the State Programme for the development of housing, etc.

**7.A** Try to remember what other natural disasters you have faced in the past:

**7.1.** A. Do you remember any kinds of restrictions that you had to take? (no open fires, no pumping of water from the river, etc.)

1 - drought; 2 - strong winds; 3 - hail; 4 - severe frost; 5 - soil erosion; 6 - other \_\_\_\_\_

| Kind | What damage occurred: | 1. Method of settlement (financial, repairing, changes, ...) 2. Prohibitions, restrictions | Year |
|------|-----------------------|--------------------------------------------------------------------------------------------|------|
|      |                       |                                                                                            |      |
|      |                       |                                                                                            |      |
|      |                       |                                                                                            |      |

## **PART B - HOUSEHOLD ADAPTATION MEASURES**

This section refers to specific measures that you have taken to protect your home against natural risks

---

**1.B** Can you give the year when your house was built? \_\_\_\_\_

**2.B** Where is your house situated?

1. On flat ground
2. On a gentle slope
3. On a steep slope

**3.B Your house has:**

- |                 |                                  |
|-----------------|----------------------------------|
| 1. A basement   | 4. Two storeys                   |
| 2. No basement  | 5. Three storeys                 |
| 3. Ground floor | 6. More than three storeys _____ |

**4.B** What building materials are the load-bearing walls of your house made from?

1. Fired brick
2. Combination of fired and unfired bricks
3. Unfired brick (adobe)
4. Hollow brick

**5.** Autoclaved aerated concrete

**6. Other - what** \_\_\_\_\_

---

**5.B** At what height above the ground does your living space start?

1. Ground floor at ground level
2. About one metre above ground level
3. Ground floor higher than 1 metre above ground level ("raised floor")

**6.B** Is your house is protected against damp or flooding in general?

If you made these adjustments to your house after having experienced floods, when was it?

|                         | Just cutting | Waterproofing,<br>drainage around the<br>house | Total rebuilding of<br>drainage system from<br>the land | Landscaping<br>(embankments , wall,<br>trench , planting of<br>greenery , etc. ) |
|-------------------------|--------------|------------------------------------------------|---------------------------------------------------------|----------------------------------------------------------------------------------|
| Before flood of<br>1997 |              |                                                |                                                         |                                                                                  |
| 1997 -before<br>2006    |              |                                                |                                                         |                                                                                  |
| 2006 -before<br>2010    |              |                                                |                                                         |                                                                                  |
| after flood of<br>2010  |              |                                                |                                                         |                                                                                  |
| Other date:             |              |                                                |                                                         |                                                                                  |

7.B.1 Other repairs / date\_\_\_\_\_

\_\_\_\_\_

**7.B** What measures to the interior did you take after the flood and in which years?

|                      | Move things from the basement | changing the floors | Mobile barriers on doors and windows |
|----------------------|-------------------------------|---------------------|--------------------------------------|
| before flood of 1997 |                               |                     |                                      |
| 1997 - before 2006   |                               |                     |                                      |
| 2006 - before 2010   |                               |                     |                                      |
| after flood of 2010  |                               |                     |                                      |
| Other date:          |                               |                     |                                      |

**7.1.B** Other measures in the interior (for example, installation of drainage channels in the floor, etc.)

---

**7.2.B** Date (before / after which flood)\_\_\_\_\_

**8.B** Is your property insured? Against what? Specify the year of signing the contract

| Property / Insurance   | against theft and vandalism (year) | against natural disasters in general, such as lightning, hail ... (year) | Do you have specific insurance against floods? (Year) |
|------------------------|------------------------------------|--------------------------------------------------------------------------|-------------------------------------------------------|
| Household and property |                                    |                                                                          |                                                       |
| Land, farm buildings   |                                    |                                                                          |                                                       |

**8.1.B** Did you have any problems insuring your property and household against flooding?

---

**8.2.B** Has the price of insurance increased over the last 10 years?

---

**9.B** Do you catch (rain) water in any way?

1. Yes, (drums, barrels)
2. Yes, in a different way: \_\_\_\_\_
3. Yes, I have my own water source: \_\_\_\_\_
4. No

**10.B** For what purposes do you use rainwater?

1. Watering the garden
2. WC, technical purposes
3. Other: \_\_\_\_\_

**11.B** How many litres are you able to catch? \_\_\_\_\_

**12.B** How do you heat your house (water heater, heating)?

1. Wood
2. Coal (brown / black)
3. Gas ( boiler, condensing boiler)
4. Electricity (boilers, heaters)
5. Other (solar panels / heat pump...)
7. Remote heating source

**13.B** What is your source of electricity?

1. Regular electricity provider (e.g. EON , etc. )
2. Green energy from the grid
3. Combination with alternative sources, which ones: \_\_\_\_\_

**14.C** Have you done anything to reduce energy consumption in the house? Give examples and year of implementation:

1. No
2. Roof insulation, attic,
3. Insulation of walls and floors
4. Replacement of existing windows for euro-windows
5. Sealing existing windows
6. Others, such as: \_\_\_\_\_

15.C From what source do you get your drinking water: \_\_\_\_\_

**PART C - PREPAREDNESS FOR NATURAL HAZARDS AND THEIR PERCEPTION**

This part informs us about how prepared you are for flood risk

---

**1.C** Do you follow the weather forecast?

1. Yes
2. No --> go to question 3.C.

**2.C** How often are you interested in the weather forecast?

1. Every day
2. Every second day
3. Once or twice per week

**2.1.C** From what source do you get information?

1. TV
2. Radio
3. Internet - web (which): \_\_\_\_\_
4. I also try to guess the weather for myself
5. I have my own weather station
6. I keep a meteorological diary

**3.C** How do you rate the quality of life and housing in your town? Please mark like a school grade 1 (excellent) - 5 (fail)

| Area of life                         | 1 | 2 | 3 | 4 | 5 |
|--------------------------------------|---|---|---|---|---|
| Quality of life and society          |   |   |   |   |   |
| Nature, Environment and surroundings |   |   |   |   |   |

**4.C** In what area do you think you live with regard to risk of flooding?

1. There is no risk for me
2. In an area of low risk (sometimes)
3. In an area of high risk (often)



4. I don't know

**4.1. C** In what area do you live with regard to drought (in terms of rainfall, availability of surface and ground water)?

1. There is no risk for me
2. In an area of low risk (sometimes)
3. In an area of high risk (often)
3. I don't know

**5.C** In your opinion what influences the occurrence of floods (and other natural risks)?

1. Human activity has a significant effect on the occurrence of natural risks
2. It's the influence of weather and nature, which we can't control
3. Both, it is a combination of human activities and weather

If you have your own opinion , please write it here:

---

---

---

**6.C** Please evaluate the level of anti - flood protection in your town

(1 excellent - 5 insufficient) 1 - 2 - 3 - 4 - 5

If you have your own opinion, please write it here:

---

---

**7.C** In your opinion how ready is your household for natural risks, especially future floods or drought?

(1 - well-prepared, 5 - unprepared)

1    2    3    4    5

**8.C** Write what you plan to (would like to) do to make your house adequately prepared for floods and other natural risks

---

---

**9.C** Have you observed in recent years (approximately 5-10 years) a change in the local climate throughout the year where you live?

1. Yes , it is changing significantly
2. I have not observed any significant changes
3. I don't know

**10.C** What specific changes have you noticed ?

|                                                     |     |    |              |
|-----------------------------------------------------|-----|----|--------------|
| 1. Earlier onset of spring                          | YES | NO | I DON'T KNOW |
| 2. Higher temperatures lasting for longer in summer | YES | NO | I DON'T      |
| KNOW                                                |     |    |              |

|                                                         |     |     |              |
|---------------------------------------------------------|-----|-----|--------------|
| 3. Milder winters                                       | YES | NO  | I DON'T KNOW |
| 4. Colder winters                                       | YES | NO  | I DON'T KNOW |
| 5. Radical changing of the weather                      |     | YES | NO I DON'T   |
| KNOW                                                    |     |     |              |
| 6. More frequent droughts                               | YES | NO  | I DON'T KNOW |
| 7. More frequent occurrence of heavy rains and flooding | YES | NO  | I DON'T KNOW |
| 8. The emergence of new species (or pests)              | YES | NO  | I DON'T KNOW |

**11.C** Have you noticed other changes? Write which ones:

---



---



---



---



---



---



---

## PART F - SOCIO - DEMOGRAPHIC

### 0.F How long have you lived in your town?

1. \_\_\_\_\_ year(s).

### 1. Where did you move from?

1. Town \_\_\_\_\_ 2. Region \_\_\_\_\_ 3. Country \_\_\_\_\_

### 2.F How many people live in your house? \_\_\_\_\_ Adult(s), \_\_\_\_\_ children

### 3.F Please fill in the table for each person in your close family who lives or has permanent residency in your home.

| Person | Gender | Membership in family | Marital status | Age | Highest education attained | Field of work | Type of work | Place of work/study      | Income after tax (CZK) | How many years have you worked for altogether?<br>How many years have you been retired? | Average hours worked in a week | Permanent residency? Yes/no | Lives here? Yes/no |
|--------|--------|----------------------|----------------|-----|----------------------------|---------------|--------------|--------------------------|------------------------|-----------------------------------------------------------------------------------------|--------------------------------|-----------------------------|--------------------|
| 1      |        |                      |                |     |                            |               |              | 1. -> č. H<br>2. -> č. G |                        |                                                                                         |                                |                             |                    |
| 2      |        |                      |                |     |                            |               |              | 1. -> č. H<br>2. -> č. G |                        |                                                                                         |                                |                             |                    |
| 3      |        |                      |                |     |                            |               |              | 1. -> č. H<br>2. -> č. G |                        |                                                                                         |                                |                             |                    |
| 4      |        |                      |                |     |                            |               |              | 1. -> č. H<br>2. -> č. G |                        |                                                                                         |                                |                             |                    |
| 5      |        |                      |                |     |                            |               |              | 1. -> č. H<br>2. -> č. G |                        |                                                                                         |                                |                             |                    |
| 6      |        |                      |                |     |                            |               |              | 1. -> č. H<br>2. -> č. G |                        |                                                                                         |                                |                             |                    |
| 7      |        |                      |                |     |                            |               |              | 1. -> č. H<br>2. -> č. G |                        |                                                                                         |                                |                             |                    |
| 8      |        |                      |                |     |                            |               |              | 1. -> č. H<br>2. -> č. G |                        |                                                                                         |                                |                             |                    |
| 9      |        |                      |                |     |                            |               |              | 1. -> č. H<br>2. -> č. G |                        |                                                                                         |                                |                             |                    |

## PART G - COMMUTING TO WORK / STUDY AND MIGRATION

This part applies to commuting and migration (national and international)

---

**0.G Number of people**    3F1   3F2   3F3   3F4   3F5   3F6

**1.G Where do you commute to work / where do you study / Where do you live?**

1. Town \_\_\_\_\_ 2. Region \_\_\_\_\_ 3. Country \_\_\_\_\_

**2.G** How many kilometres do you commute to work / to study / to the place you live now?

---

**3.G** How often during the last three months have you commuted to work / study (on average)?

1. Every day
2. 2-3x per week (every second day)
3. once per week (Mon-Fri at work)
4. 2x month
5. 1x month

Other combination: \_\_\_\_\_

**4.G** How long does it take to commute to work / study / to the place you live now?

| Vehicle                      | Time (min) | Frequency of use<br>(3 regularly, sometimes 2 - rarely 1) |
|------------------------------|------------|-----------------------------------------------------------|
| Individual transport - car   |            |                                                           |
| Car - with co-passenger / s  |            |                                                           |
| Public transport - bus       |            |                                                           |
| Public transport - train     |            |                                                           |
| Combination (e.g. car+train) |            |                                                           |
| Bike                         |            |                                                           |
| Walk                         |            |                                                           |

**6.G** How long have you worked in the place where you commute to / live / study?

1. \_\_\_\_\_ year. 2. \_\_\_\_\_ month

**7.G** What is your primary purpose in commuting to work / study / residence changes ?

1. Job Opportunities
2. Family reasons
3. Dissatisfaction with living conditions
4. Repeated flood risk
5. Environmental pollution
6. Medical reasons
7. To be more independent
8. Studies at secondary School
9. Studies at university
10. Studies at a Language School
11. Other (give more details) \_\_\_\_\_

## PART H - INTENTIONS OF MOVING OR COMMUTING TO WORK / STUDY

---

### 0.H Number of people    3F1   3F2   3F3   3F4   3F5   3F6

**1.H** Is anyone in your household planning to work / study in another town, or move to another town?

1. Yes      -> question 2.H
2. No      -> finish

**2.H** What exactly do you have in mind?

1. Commuting to work
2. Commuting to study
3. Moving out

**3.H** What is your main reason?

1. Job Opportunities
2. Family reasons
3. Dissatisfaction with living conditions
4. Repeated flood risk
5. Environmental pollution
6. Medical reasons
7. To be more independent
8. Studies at secondary School
9. Studies at university
10. Studies at a Language School
11. Other (give more details) \_\_\_\_\_

**4.H** Where do you plan to go? (fill in at least one part)

1. Town \_\_\_\_\_ 2. Region \_\_\_\_\_ 3. Country \_\_\_\_\_

**5.H** For how long do you plan to commute to work / study outside of your community or reside outside of your community?

1. \_\_\_\_\_ year(s)      2. \_\_\_\_\_ month(s)      3. I don't know
